# Supplementary material for: Facile synthesis of Fe2P/Co embedded trifunctional electrocatalyst for high-performance anion exchange membrane fuel cells, rechargeable Zn–air batteries, and overall water splitting
Source: Royal Society of Chemistry journal article supplement (doi:10.1039/d2ta03099c), 2022-01-01
Supplement: d2ta03099c1.pdf [file d2ta03099c1.pdf]

## Electronic Supplementary Information (ESI)

### **Facile Synthesis of Fe<sub>2</sub>P/Co Embedded Trifunctional Electrocatalyst for High-Performance Anion Exchange Membrane Fuel Cells, Rechargeable Zn-Air Batteries and Overall Water Splitting**

Yang Bai,<sup>#</sup> Yaqin Wang,<sup>#</sup> Zelong Qiao,<sup>#</sup> Yongping Yang, Luanjie Deng, Chuanjie Li, Xiudong Chen, Shitao Wang,\* Yan Huang,\* Xianren Zhang and Dapeng Cao\*

State Key Laboratory of Organic-Inorganic Composites, Beijing University of Chemical Technology, Beijing 100029 (P. R. China)

\*Corresponding authors: [stwang@buct.edu.cn](mailto:stwang@buct.edu.cn); [huangyan@buct.edu.cn](mailto:huangyan@buct.edu.cn);  
[caodp@mail.buct.edu.cn](mailto:caodp@mail.buct.edu.cn).

<sup>#</sup> These authors contributed equally to this work

## Experimental section

### Materials

All chemicals were from commercial and used without further purification. Zinc nitrate hexahydrate ( $\text{Zn}(\text{NO}_3)_2 \cdot 6\text{H}_2\text{O}$ , 98%) and Pt/C catalysts (20 wt% Pt loading on an activated carbon support) were obtained from Alfa Aesar.  $\text{IrO}_2$  and 2-methylimidazole (98%) were purchased from Aladdin. Cobalt nitrate hexahydrate ( $\text{Co}(\text{NO}_3)_2 \cdot 6\text{H}_2\text{O}$ , 99%) and 1, 1'-Bis (diphenylphosphino) ferrocene (97%) were purchased from Macklin.

### Synthesis of DPPF@ZnCo-ZIF

Firstly, 0.6158 g 2-methylimidazole was dissolved in 15 mL methanol by ultrasonic treatment for 2 min to prepare a homogeneous solution A. Secondly, 0.4462 g  $\text{Zn}(\text{NO}_3)_2 \cdot 6\text{H}_2\text{O}$ , 0.3274 g  $\text{Co}(\text{NO}_3)_2 \cdot 6\text{H}_2\text{O}$  and 0.2079 g DPPF were dissolved in 30 mL methanol with well stirring for 60min to prepare solution B. Then, solution A was quickly added to solution B and stirred strongly for 1.5 h at room temperature. Next, the mixture solution was transferred to a 100 mL stainless steel autoclave and heated at 120 ° C for 4 h. The prepared products were collected through the centrifugal process and washed with methanol for several times. Finally, they were dried in vacuum at 70 °C for 12 h to obtain DPPF@ZnCo-ZIF. ZnCo-ZIF and DPPF@Zn-ZIF were also synthesized via similar procedure without adding DPPF or  $\text{Co}(\text{NO}_3)_2 \cdot 6\text{H}_2\text{O}$ , respectively.

### Synthesis of $\text{Fe}_2\text{P}/\text{Co}@NPC$

The resulting powder DPPF@ZnCo-ZIF, ZnCo-ZIF and DPPF@Zn-ZIF were calcined under Ar at 950 °C (ramp rate: 5 °C min<sup>-1</sup>) for 3 h separately and then cooled to room temperature. The  $\text{Fe}_2\text{P}/\text{Co}@NPC$ ,  $\text{Co}@NC$  and  $\text{Fe}_2\text{P}@NPC$  were collected without further treatment. To determine the optimum conditions for the formation of  $\text{Fe}_2\text{P}/\text{Co}@NPC$  catalysts, different pyrolysis temperatures

(850, 950, 1050 °C) were also examined denoted as Fe<sub>2</sub>P/Co@NPC -X (X =850,950,1050). The Fe<sub>2</sub>P/Co@NPC mentioned below refers to the sample synthesized with the temperature at 950 °C in particular.

### **Structural characterization of the samples**

SEM and TEM images of the samples were received by HITACHI S-4800 and TECNAI G2 F20 microscopes, respectively. PXRD were performed on a D8 ADVANCE X-ray diffractometer (Cu K $\alpha$  radiation as source). The pore structure was investigated by N<sub>2</sub> adsorption-desorption measurements on an ASAP 2460 instrument. XPS measurements were conducted on the Thermo Fisher ESCALAB 250 with an Al K $\alpha$  X-ray source. In order to determine the element contents, ICP measurements were conducted on Inductively Coupled Plasma Optical Emission Spectrometer (ICP-OES). Raman spectra were recorded on a LabRam HR Evolution, using 514 nm as laser.

### **Electrochemical measurements**

The Electrochemical performances of ORR, OER and HER were recorded by Electrochemical Workstation (CHI 760E, Shanghai Chenhua Instrument Corporation, China). All electrochemical measurements were made on a typical three-electrode system. Platinum mesh was used as counter electrode for ORR test, graphite rod for OER and HER test. The saturated calomel electrode is used as a reference electrode. All the potential is converted to a reversible hydrogen electrode. For ORR, the LSV curves were obtained in a 0.1 M KOH solution saturated with O<sub>2</sub> at a scan rate of 5 mV·s<sup>-1</sup> and a rotation speed of 1600 rpm in the potential range of 0.1 to -1 V. The electron transfer number (n) and the yield of H<sub>2</sub>O<sub>2</sub> are obtained from the following equation through RRDE:

$$n = 4 \frac{I_D}{\frac{I_R}{N} + I_D}$$

$$H_2O_2\% = 200 \frac{I_R/N}{\frac{I_R}{N} + I_D}$$

where  $I_D$  is disk current,  $I_R$  is ring current, and  $N$  is the current collection efficiency of the Pt ring,  $N = 0.37$ .<sup>1</sup>

The electron transfer number ( $n$ ) and kinetic current density ( $J_k$ ) can also be calculated based on the Koutecky-Levich (K-L) equation:

$$\frac{1}{J} = \frac{1}{J_K} + \frac{1}{J_L} = \frac{1}{J_K} + \frac{1}{B\omega^{\frac{2}{3}}}$$

$$B = 0.62nFC_0D_0^{\frac{2}{3}}V^{-\frac{1}{6}}$$

Where  $J$  is the measured current density,  $J_K$  and  $J_L$  are the kinetic and limiting current density respectively,  $\omega$  is the angular velocity of the disk,  $n$  is the number of electron transfers,  $F$  is the Faraday constant ( $96485 \text{ C}\cdot\text{mol}^{-1}$ ), and  $C_0$  is the concentration of  $O_2$  ( $1.2 \times 10^{-6} \text{ mol}\cdot\text{cm}^{-3}$ ),  $D_0$  is the diffusion coefficient of  $O_2$  in 0.1 M KOH ( $1.9 \times 10^{-5} \text{ cm}^2\cdot\text{s}^{-1}$ ), and  $V$  is the kinematic viscosity of the electrolyte ( $0.01 \text{ cm}^2\cdot\text{s}^{-1}$ ).<sup>2</sup> To eliminate the error, the oxygen reduction current ( $J$ ) the oxygen reduction current is calculated as the current measured in saturated oxygen minus saturated nitrogen.

The 1 M KOH solution was used as the electrolyte for OER and HER tests. All LSV curves are obtained by IR compensation. The CV curves at different scan rates are also measured to determine the electrochemical double layer capacitance ( $C_{dl}$ ), and then ESCA can be calculated based on the  $C_{dl}$  value.

The synthesized  $Fe_2P/Co@NPC$  were applied as the cathode catalyst with the loading of  $1 \text{ mg cm}^{-2}$ . PtRu/C (40 wt% Pt and 20 wt% Ru on Vulcan XC-72, Johnson Matthey) was used as the anode catalyst with the loading of  $0.4 \text{ mg}_{PtRu} \text{ cm}^{-2}$ . The catalyst ink was prepared by ultrasonically dispersing the catalysts and PAP-TP-100 (the hydroxide exchange membrane and ionomer, 5 wt% in ethanol) into



water and isopropanol (1:25 v/v) for 2.0 h. Then the catalyst ink was sprayed onto both sides of PAP-TP-85 membrane (15  $\mu\text{m}$ ) to fabricate a catalyst-coated membrane (CCM) with the electrode area of 5  $\text{cm}^2$ . All CCMs were immersed into 3 M KOH solution for 4.0 h (exchange the solution every 2.0 h) and then rinsed thoroughly with deionized water until the pH of the residual water was neutral. The obtained CCM was assembled with a fluorinated ethylene propylene (FEP) gasket, a GDL (SGL 29 BC), a graphite bipolar plate with 5  $\text{cm}^2$  flow field (Electro Chem) and a metal current collector for each side to complete the full HEMFC. The  $\text{H}_2$ - $\text{O}_2$  fuel cell were tested (Scribner 850e) under galvanic mode using humidified  $\text{H}_2$  and  $\text{O}_2$ . The cell temperature was set to 80  $^\circ\text{C}$ , and the flow rate of both  $\text{H}_2$  and  $\text{O}_2$  gas was 1.0 and 1.5  $\text{L min}^{-1}$  with 2.5 bar backpressure.

We assembled a self-made Zn-air battery, in which 6 M KOH and 0.2 M ZnO were served as electrolyte, zinc piece and  $\text{Fe}_2\text{P/Co@NPC}$ -loaded carbon paper (1  $\text{mg cm}^{-2}$ ) used as the anode and air cathode, respectively. The stability of  $\text{Fe}_2\text{P/Co@NPC}$  was evaluated using a rechargeable zinc air battery at a current density of 5  $\text{mA cm}^{-2}$ . For comparison, a Zn-air battery based on Pt/C- $\text{IrO}_2$  was also assembled (using a mixture of Pt/C and  $\text{IrO}_2$  as an electrocatalyst with a mass ratio of 1:1). In order to test the overall water-splitting activity, two identical  $\text{Fe}_2\text{P/Co@NPC}$  electrodes coated on carbon paper were assembled into a full electrolyzer configuration. The catalyst loading was 1  $\text{mg}\cdot\text{cm}^{-2}$  in 1M KOH solution.

### **Working electrode preparations**

In short, a 5mg sample was dispersed in a 1mL solution containing 600  $\mu\text{L}$  anhydrous ethanol, 400  $\mu\text{L}$  water, and 50  $\mu\text{L}$  Nafion (5 wt%) to prepare homogeneous catalytic ink and then treated with

ultrasound for 1 h. Then the obtained homogeneous catalyst inks 15  $\mu\text{L}$  were dropped onto RDE (0.19625  $\text{cm}^2$ ) and then dried at room temperature to afford a mass loading of about 0.364  $\text{mg cm}^{-2}$ . Commercial platinum carbon (20 wt%) and  $\text{IrO}_2$  catalyst inks were prepared using the same process for comparison.

### **DFT calculation details.**

DFT calculations were performed through the projector augmented wave (PAW) method by using the Vienna ab initio simulation package (VASP). The Generalized gradient approximation (GGA) method with the Perdew-Burke-Ernzerhof (PBE) was adopted as the exchange-correlation functional. The kinetic cutoff energy was set to 450 eV. The k-mesh in Brillouin zones was determined based on Monkhorst–Pack kpoint grids. The calculation uses gamma-centered k-points  $1 \times 3 \times 1$  for  $\text{Fe}_2\text{P}(111)$ - $\text{Co}(111)$  heterojunction,  $6 \times 5 \times 1$  for  $\text{Co}(111)$ ,  $5 \times 5 \times 1$  for  $\text{Fe}_2\text{P}(111)$ , zero damping DFT-D3 method of Grimme, and the convergence tolerance for the residual force and energy on each atom during structure relaxation were set to  $0.02 \text{ eV \AA}^{-1}$  and  $10^{-5} \text{ eV}$ . The spin was constrained for all the systems with unpaired electrons. VASP-sol package<sup>3</sup> is used to simulate the solution environment, where the over dielectric constant ( $\epsilon_r$ ) is set to 80<sup>4,5</sup>. The z-direction is set to 20  $\text{\AA}$ , which is to avoid steric hindrance and interaction due to periodicity. The optimization of the unit cell parameters is carried out by the method of fixing the lattice vector (modify `constr_cell_relax.F` file in VASP and recompile), the cell parameters are obtained as  $30.000 \times 6.758 \times 20.000$ ,  $a=b=c=90^\circ$  for  $\text{Fe}_2\text{P}(111)$ - $\text{Co}(111)$ ,  $4.209 \times 4.872 \times 20.000$ ,  $a=b=c=90^\circ$  for  $\text{Co}(111)$ , and  $6.438 \times 6.439 \times 20.000$ ,  $a=b=90^\circ$ ,  $c=94.802^\circ$  for  $\text{Fe}_2\text{P}(111)$ . The free energy diagrams were estimated as follow to illustrate the activity of ORR<sup>6,7</sup>:

$$\Delta G = \Delta E + \Delta ZPE - T\Delta S + \Delta G_U + \Delta G_{PH}$$

$$\varphi = G_{abslab} - G_{slab}$$

Where  $\Delta E$  is the reaction energy of reactant and product molecules adsorbed on catalyst surface based on the DFT calculations;  $\Delta ZPE$  and  $\Delta S$  are the change of zero-point energy and entropy,  $T$  is the temperature (here, 298.15 K is selected). The bias effect on the free energy is taken into account by  $\Delta G_U = -neU$ , where  $U$  is the electrode applied potential relative to RHE as mentioned above,  $e$  is the elementary charge transferred and  $n$  is the number of proton-electron pairs transferred.  $\Delta G_{PH}$  is the correction of the  $H^+$  free energy and depends on the reaction. In our work, the  $U$  is considered as 0 V,  $PH$  is 0,  $\Delta ZPE$  and  $\Delta S$  are considered as  $G_K$  (calculated by VASP-kit code <sup>8</sup>),  $T$  is 298.15K. So we can get the following formula.

$$\Delta G = \Delta E + G_K$$

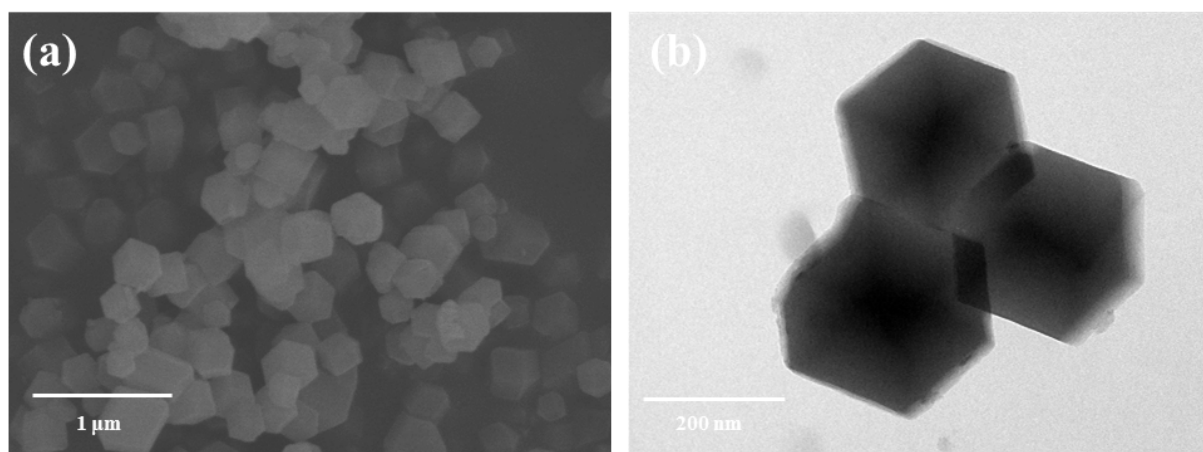

**Figure S1.** a) SEM image, b) TEM image of DPPF@ZnCo-ZIF.

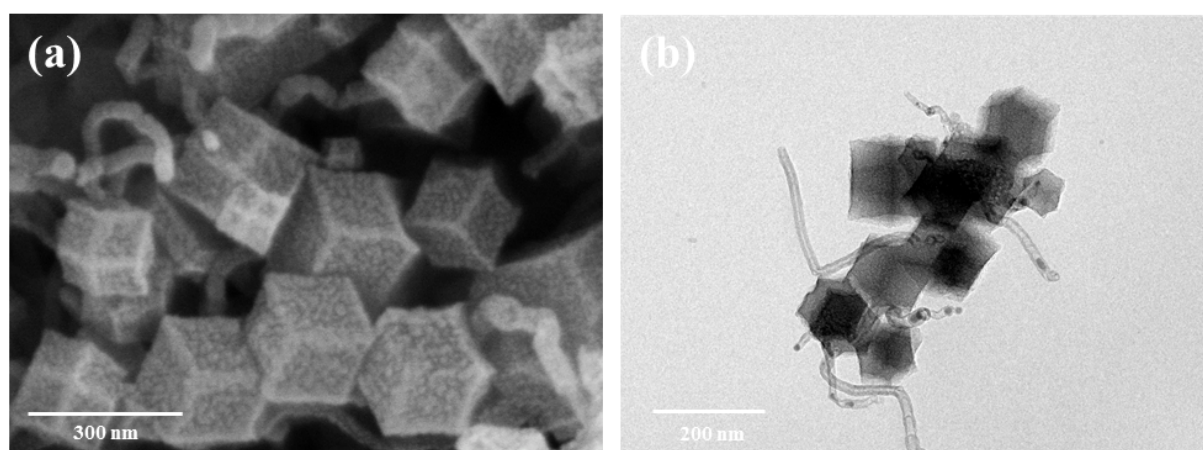

**Figure S2.** a) SEM image, b) TEM image of Co@NC.

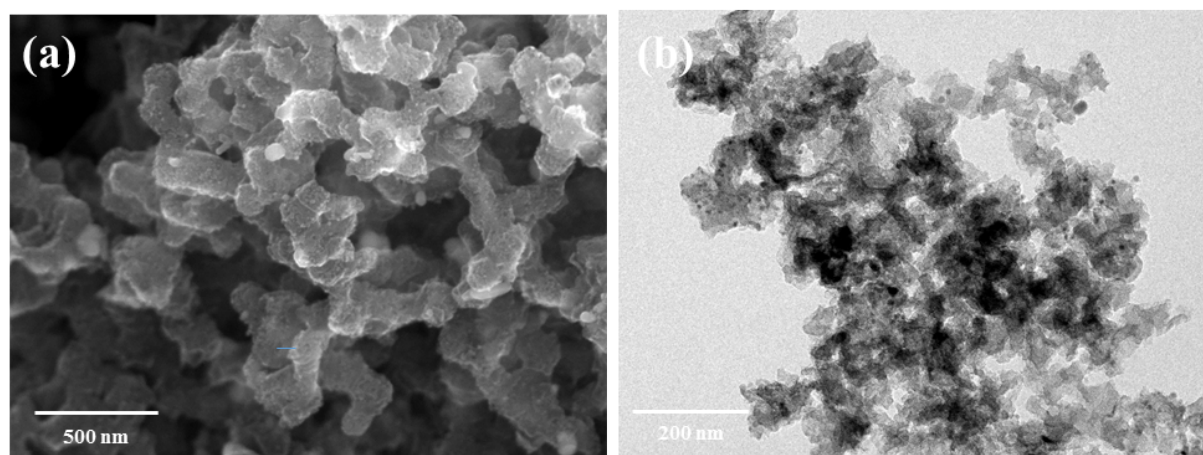

**Figure S3.** a) SEM image, b) TEM image of Fe<sub>2</sub>P@NPC.

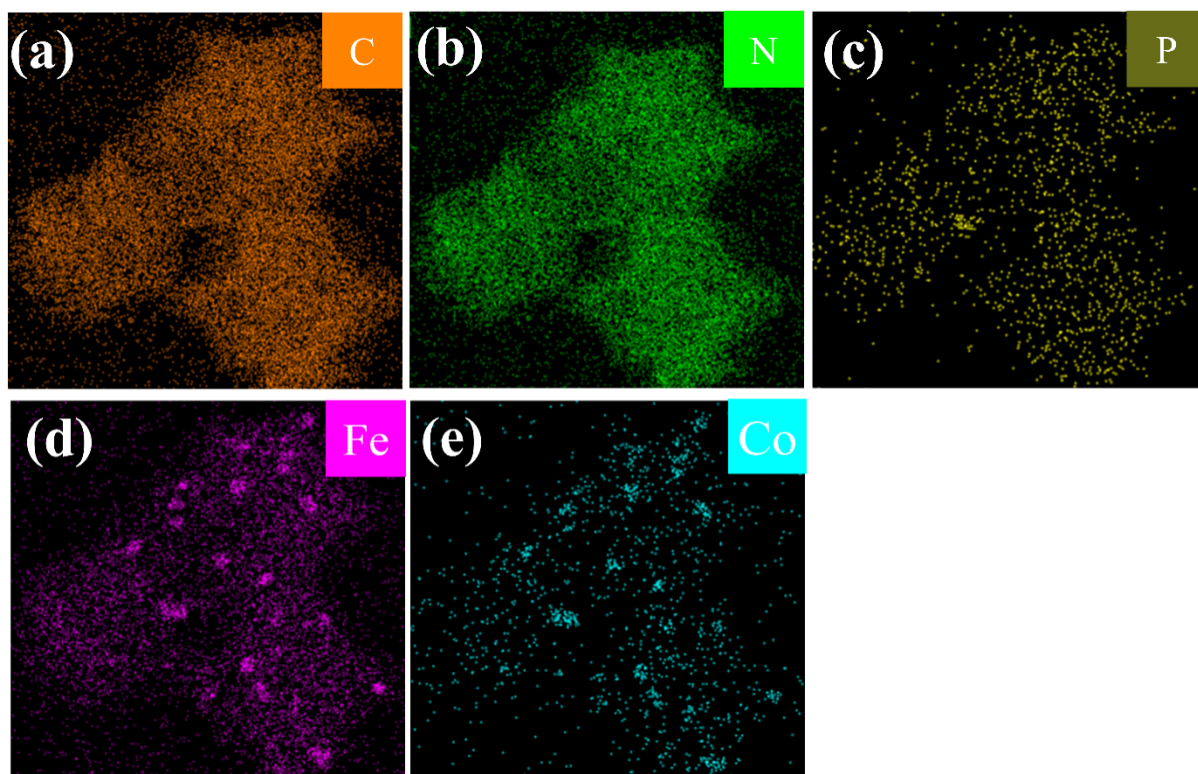

**Figure S4.** a-e) Elemental mapping of Fe<sub>2</sub>P/Co@NPC.

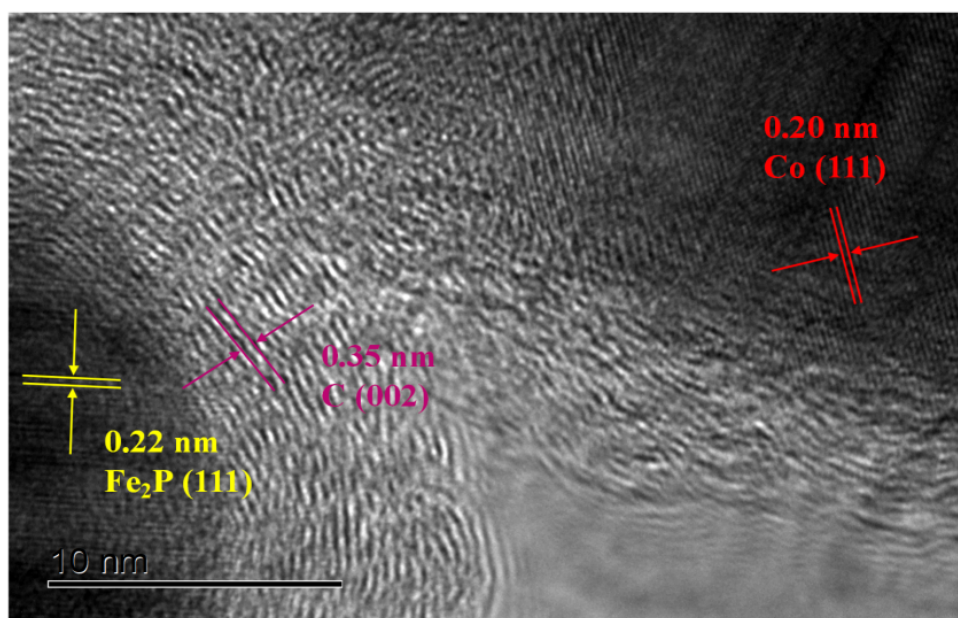

**Figure S5.** TEM image of Fe<sub>2</sub>P/Co@NPC.

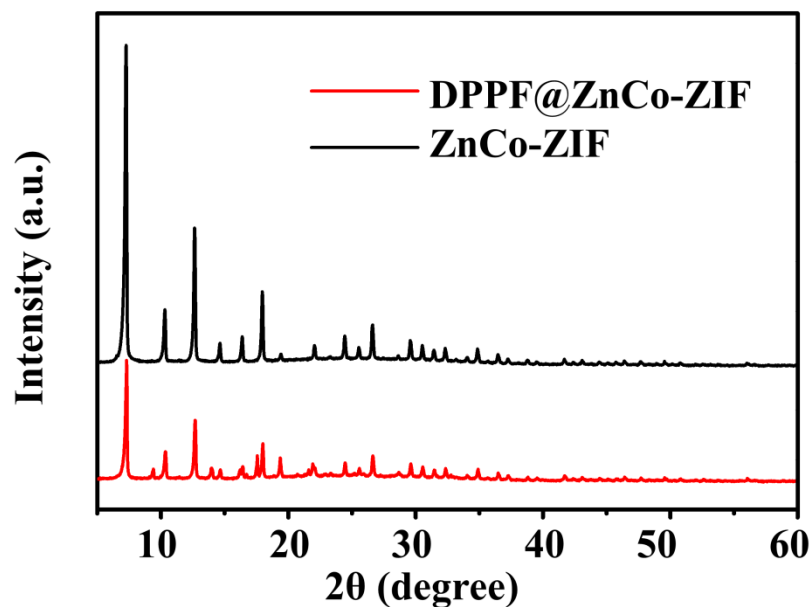

**Figure S6.** XRD pattern of DPPF@ZnCo-ZIF and ZnCo-ZIF.

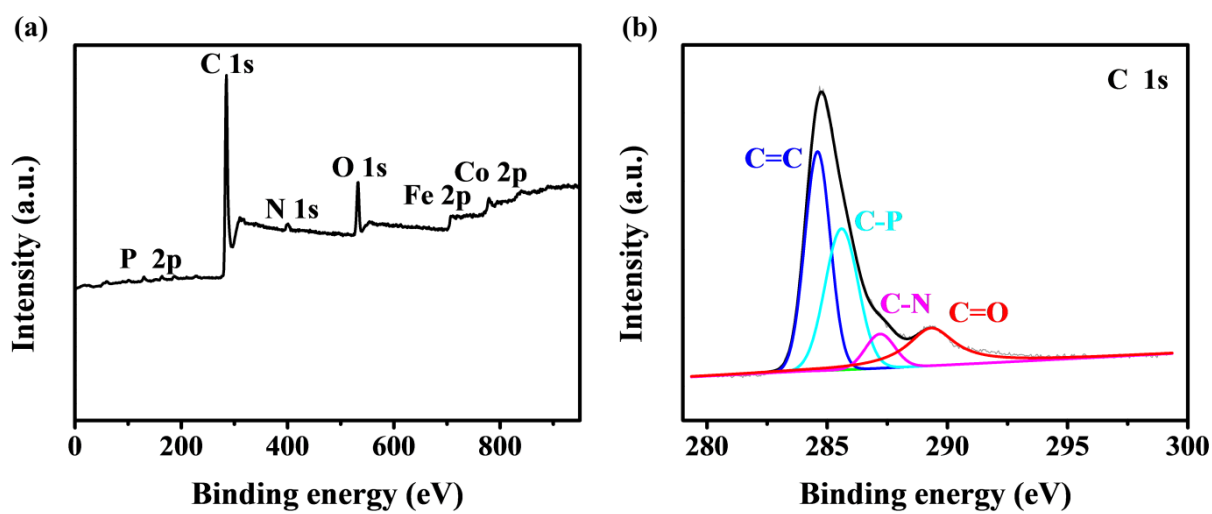

**Figure S7.** a) XPS survey spectrum (the inset table is surface atomic weight percentages). b) High-resolution XPS spectrum of C 1s of Fe<sub>2</sub>P/Co@NPC.

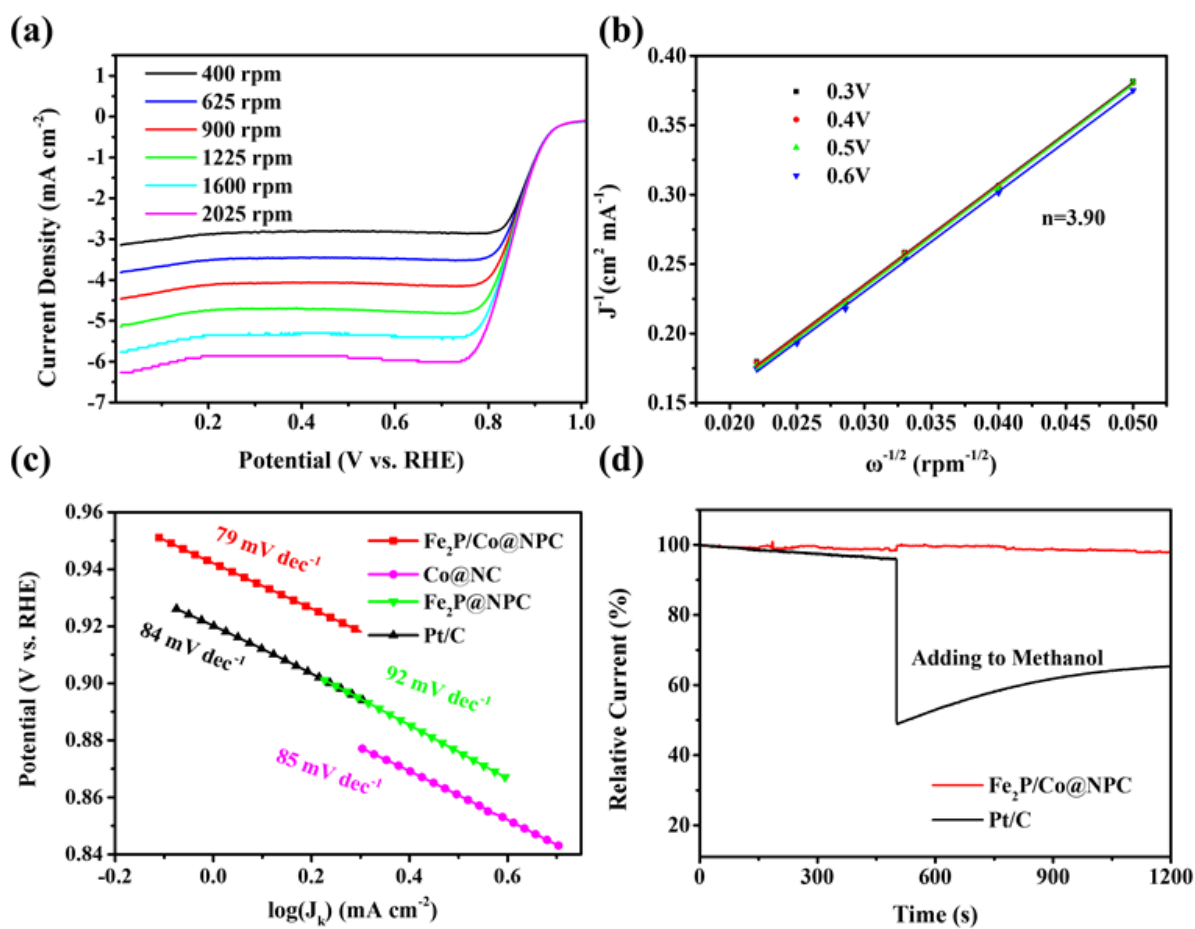

**Figure S8.** a) LSV curves of  $\text{Fe}_2\text{P}/\text{Co}@NPC$  sample at different rotation speed. b) K-L plots of  $\text{Fe}_2\text{P}/\text{Co}@NPC$  at different potentials. c) Tafel plot of  $\text{Fe}_2\text{P}/\text{Co}@NPC$ ,  $\text{Co}@NC$ ,  $\text{Fe}_2\text{P}@NPC$  and  $\text{Pt}/\text{C}$ . d) Chronoamperometric response of  $\text{Fe}_2\text{P}/\text{Co}@NPC$  and  $\text{Pt}/\text{C}$  with methanol added at 500 s.



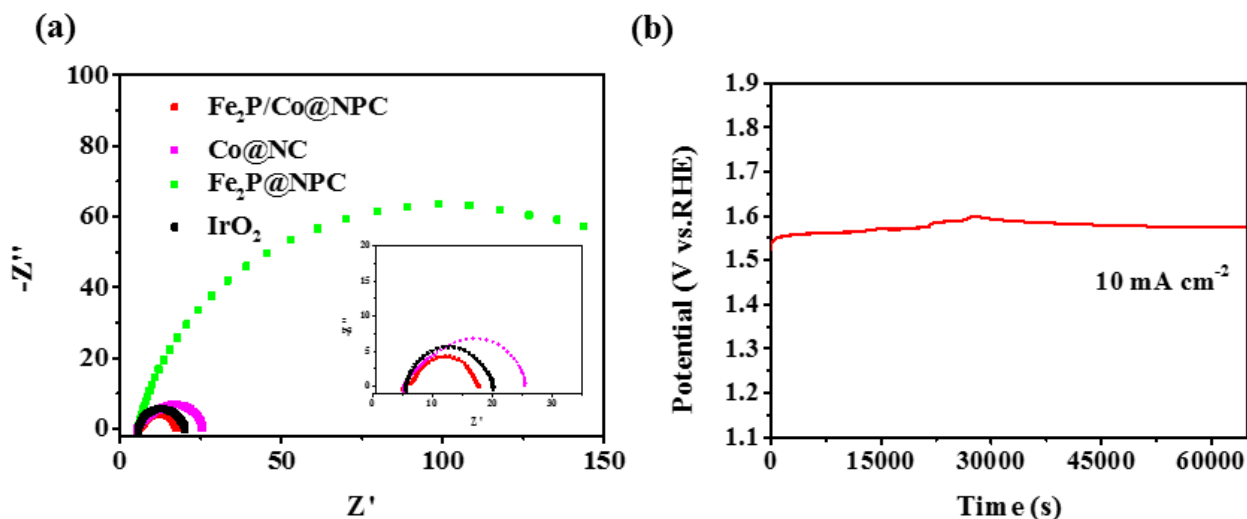

**Figure S9.** a) Nyquist plots for  $\text{Fe}_2\text{P}/\text{Co@NPC}$ ,  $\text{Co@NC}$ ,  $\text{Fe}_2\text{P@NPC}$  and  $\text{IrO}_2$  during OER. b) Chronoamperometric responses of  $\text{Fe}_2\text{P}/\text{Co@NPC}$  in 1 M KOH at a current density of  $10 \text{ mA cm}^{-2}$  in OER.

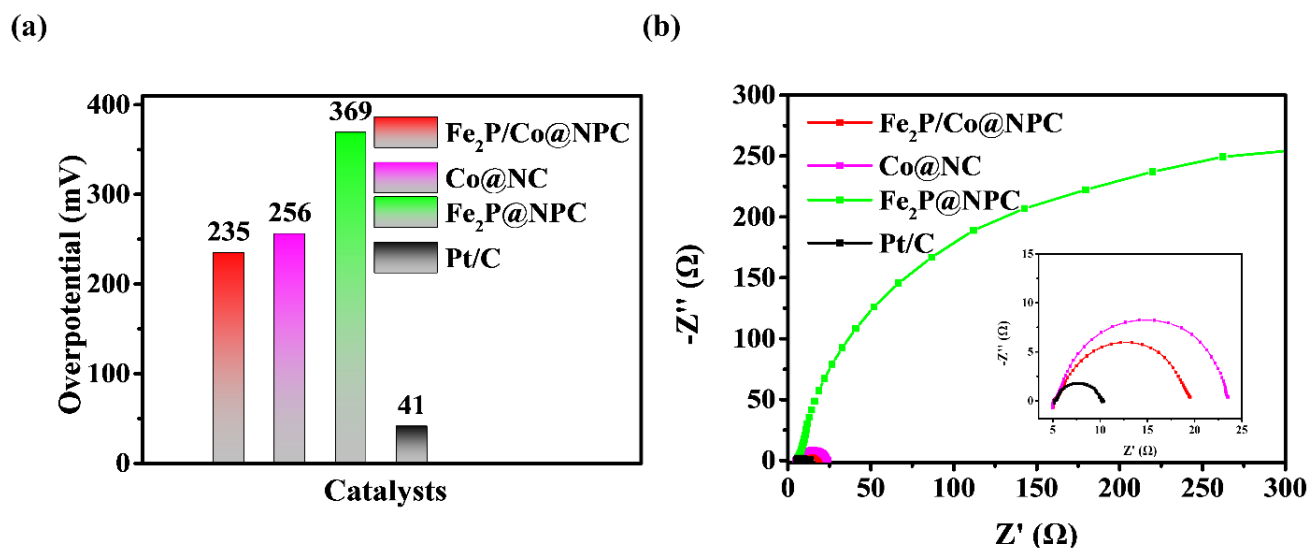

**Figure S10.** a) Comparison of the overpotential required at  $10 \text{ mA cm}^{-2}$  among  $\text{Fe}_2\text{P}/\text{Co@NPC}$  in HER. b) Nyquist plots for  $\text{Fe}_2\text{P}/\text{Co@NPC}$ ,  $\text{Co@NC}$ ,  $\text{Fe}_2\text{P@NPC}$  and  $\text{Pt/C}$  during HER.



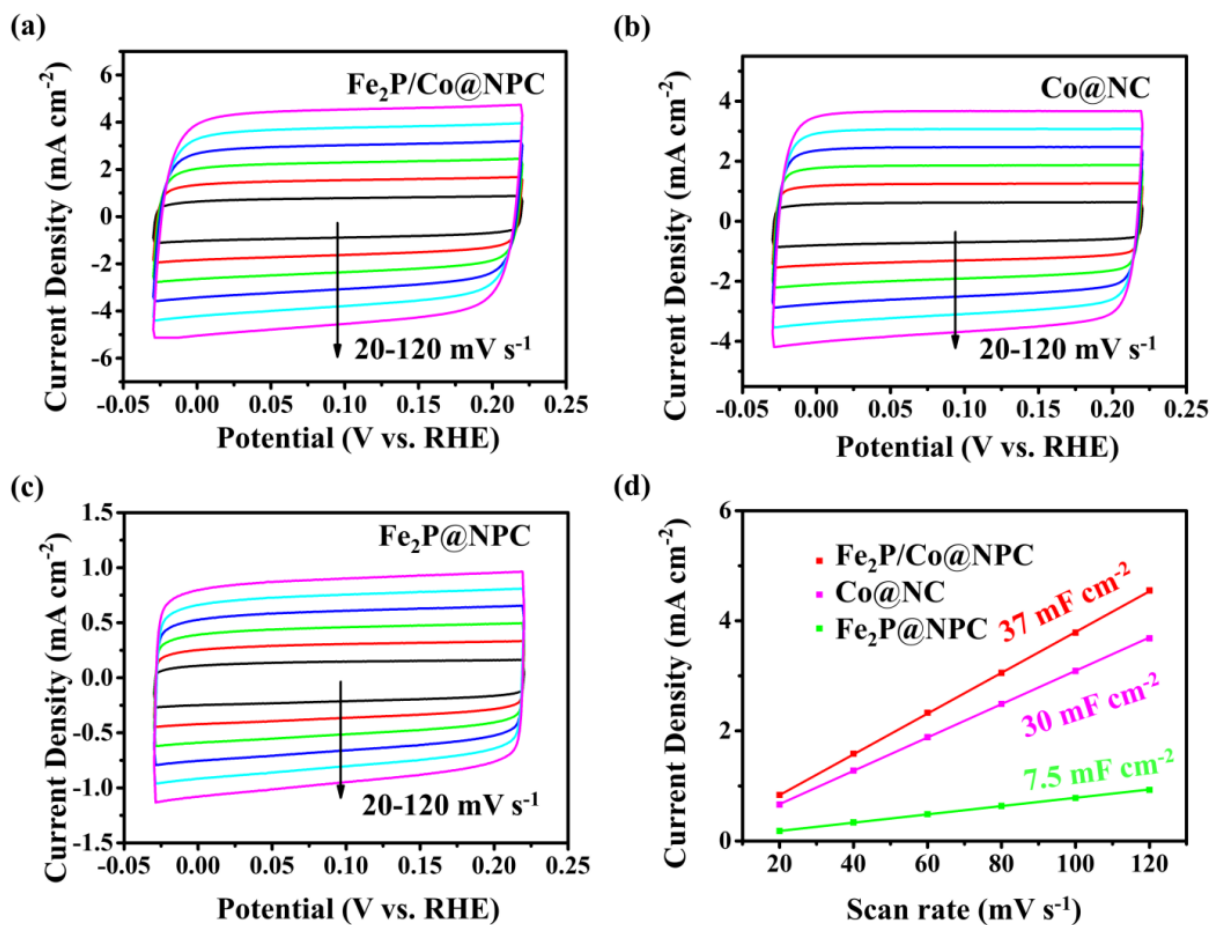

**Figure S11.** CV curves of a) Fe<sub>2</sub>P/Co@NPC, b) Co@NC, c) Fe<sub>2</sub>P@NPC in 1 M KOH electrolyte for HER. d) Current density versus scan rate for Fe<sub>2</sub>P/Co@NPC, Co@NC and Fe<sub>2</sub>P@NPC.

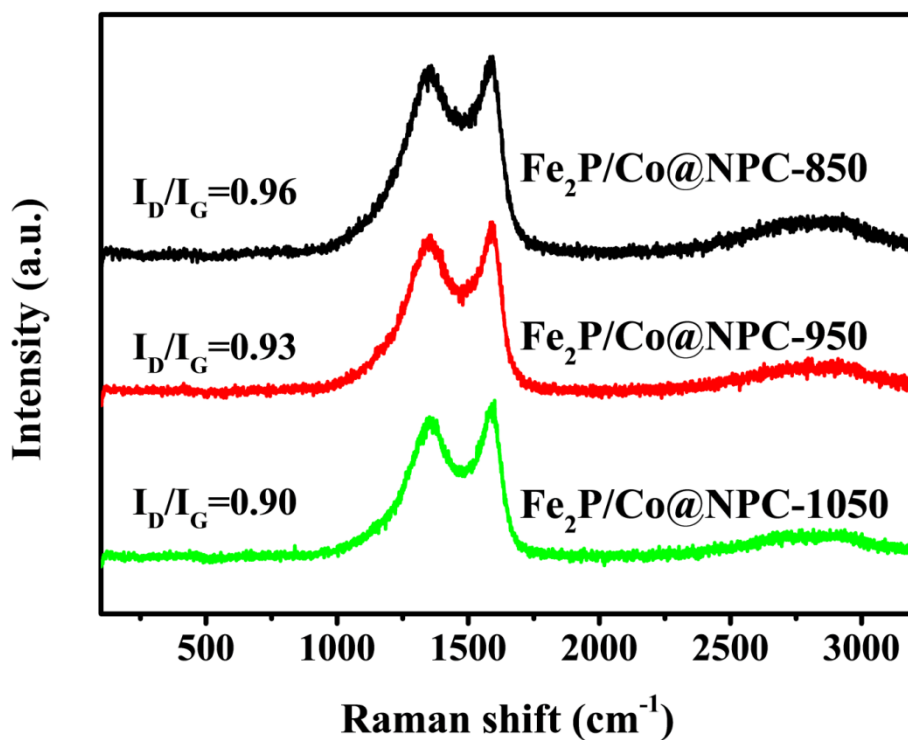

Figure S12. Raman spectra of Fe<sub>2</sub>P/Co@NPCs at different pyrolysis temperature.

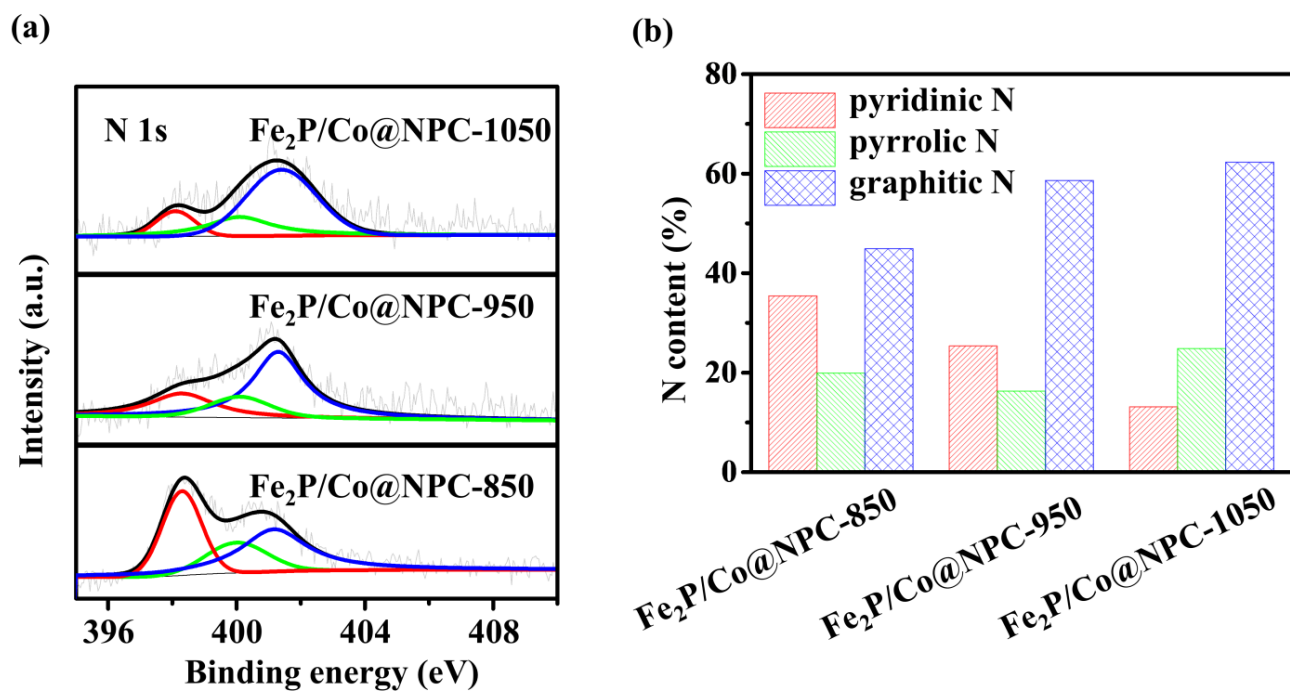

Figure S13. a) High-resolution XPS spectrum of N 1s for Fe<sub>2</sub>P/Co@NPCs at different pyrolysis temperature. b) The contents of various doped N.

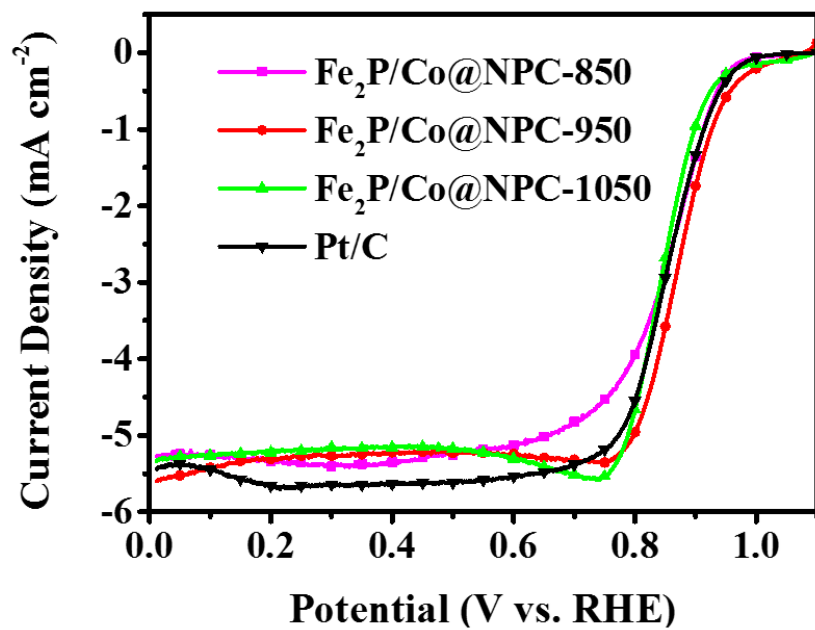

**Figure S14.** a) ORR polarization curves of Fe<sub>2</sub>P/Co@NPCs at different pyrolysis temperature and Pt/C.

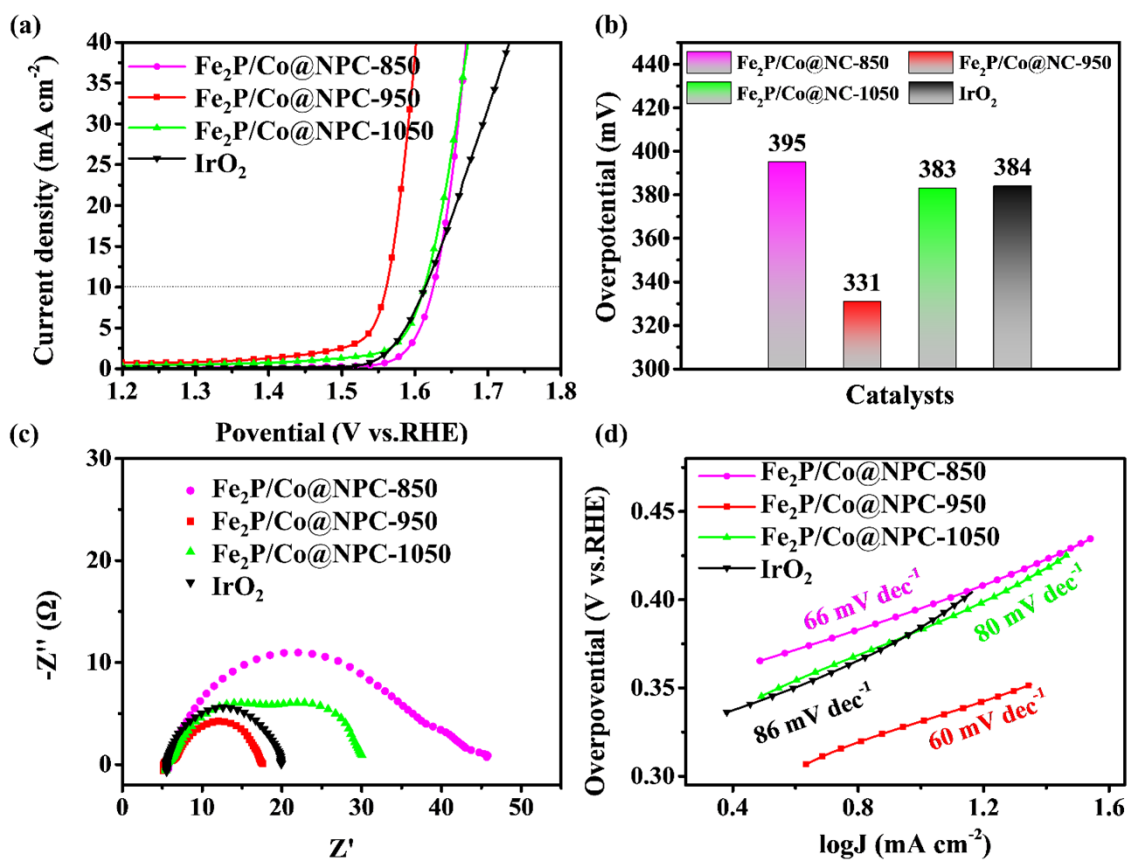

**Figure S15.** a) OER polarization curves, b) comparison of the overpotential required at 10 mA cm<sup>-2</sup>, c) Nyquist plots, d) Tafel plot of Fe<sub>2</sub>P/Co@NPCs at different pyrolysis temperature and IrO<sub>2</sub> in 1 M KOH.

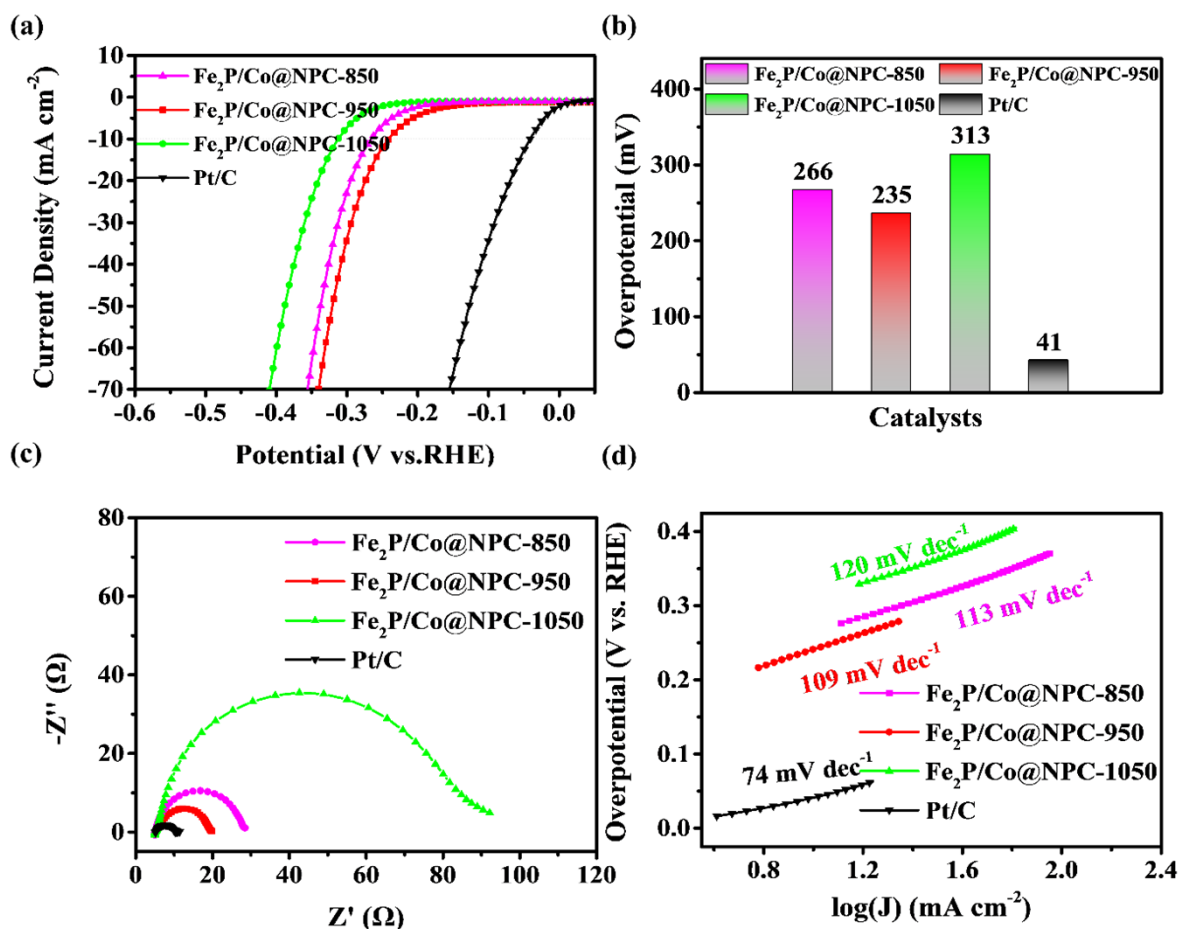

**Figure S16.** a) HER polarization curves, b) comparison of the overpotential required at 10 mA cm<sup>-2</sup>, c) Nyquist plots, d) Tafel plot of Fe<sub>2</sub>P/Co@NPCs at different pyrolysis temperature and Pt/C in 1 M KOH.

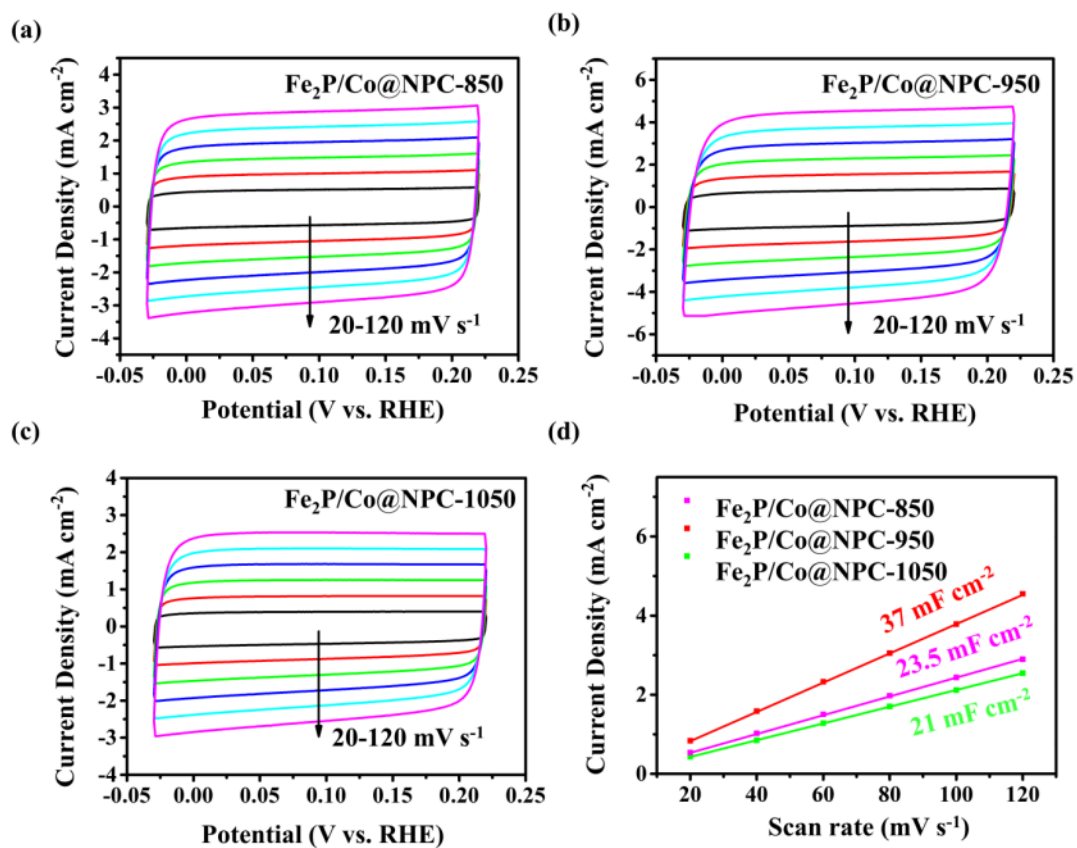

**Figure S17.** CV curves of a) Fe<sub>2</sub>P/Co@NPC-850, b) Fe<sub>2</sub>P/Co@NPC-950, c) Fe<sub>2</sub>P/Co@NPC-1050 in 1 M KOH electrolyte for HER. d) Current density versus scan rate for Fe<sub>2</sub>P/Co@NPCs at different pyrolysis temperature.

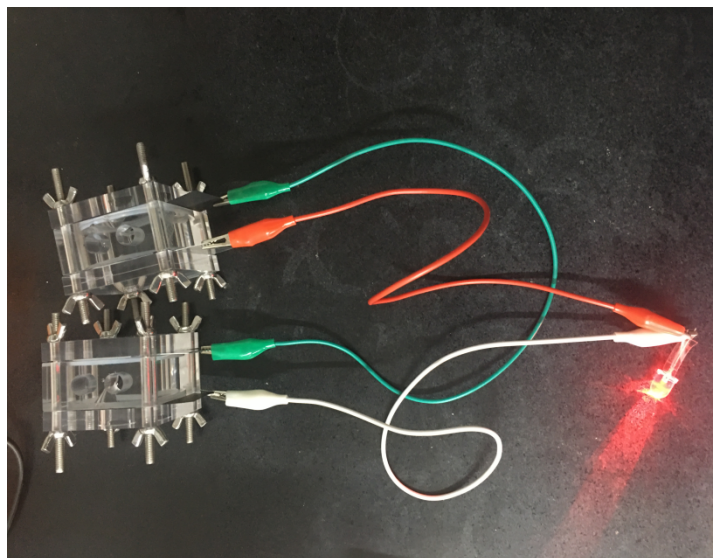

**Figure S18.** LED powered by two Zn-air batteries with the  $\text{Fe}_2\text{P}/\text{Co}@/\text{NPC}$  as air-cathode connected in series.

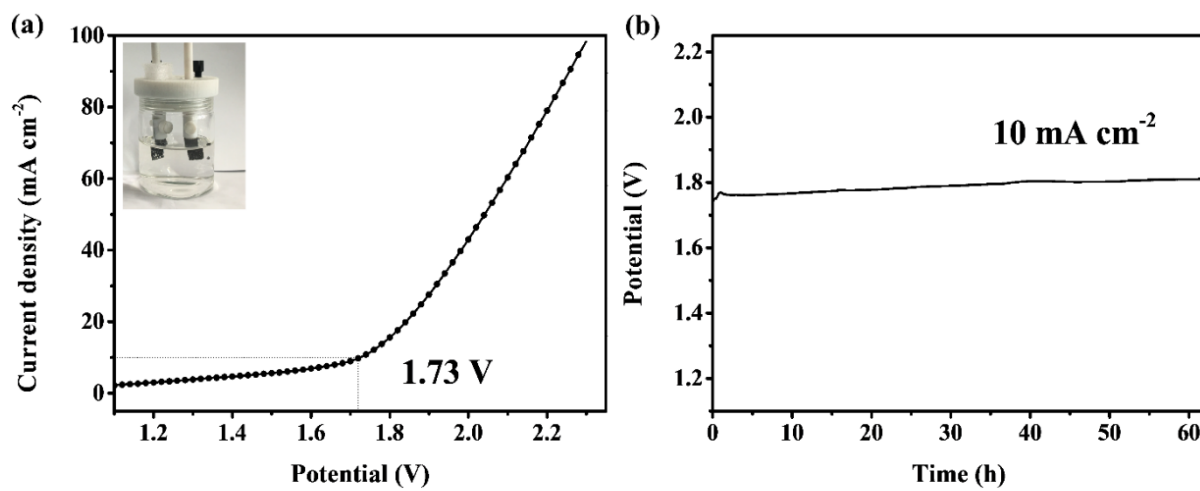

**Figure S19.** a) Polarization curves for overall water splitting (inset shows the photograph of a water electrolyzer). b) Chronoamperometric response curves for the water splitting device.

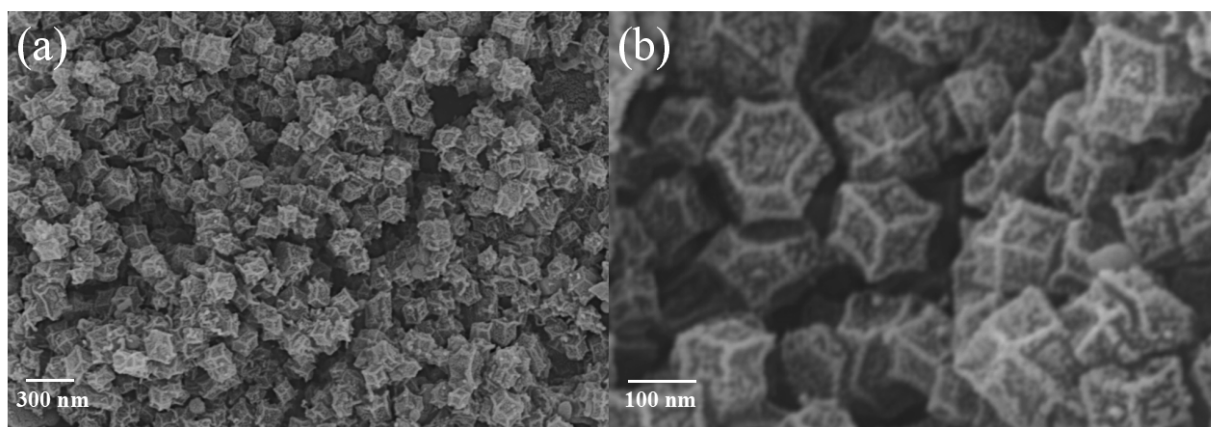

Figure S20. SEM image of  $\text{Fe}_2\text{P}/\text{Co}@\text{NPC}$  after 2000 cycles of CV test for ORR.

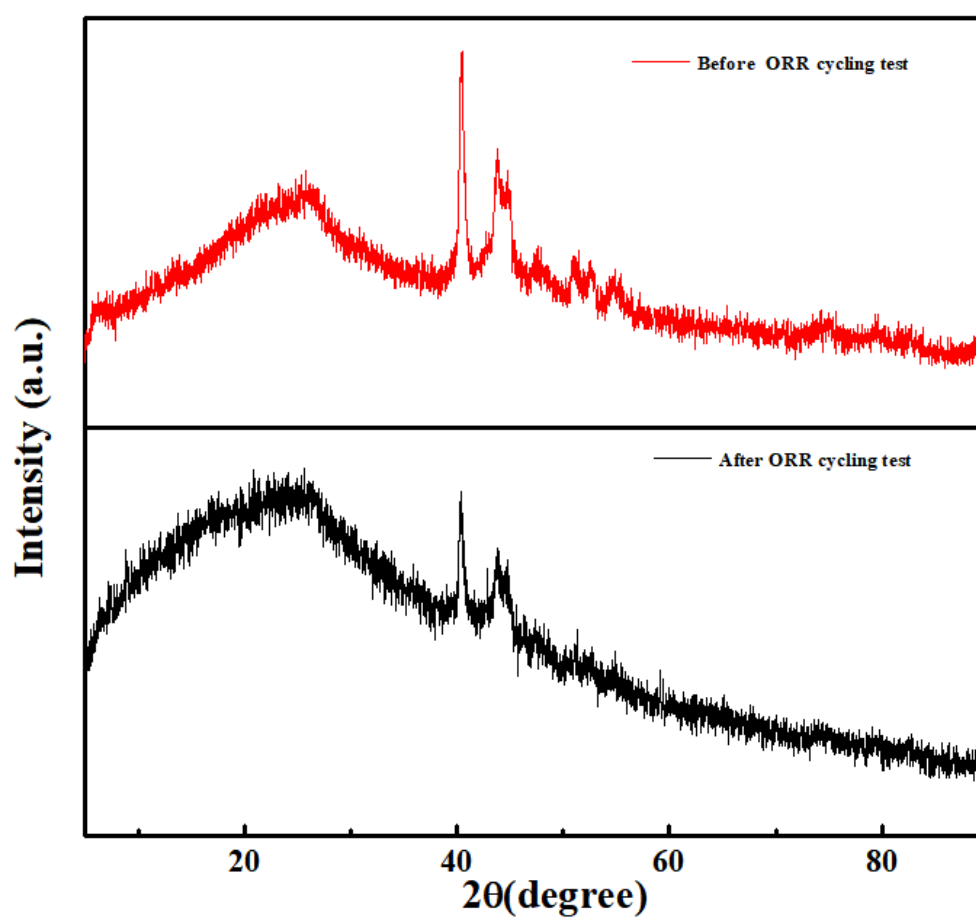

Figure S21. XRD patterns of  $\text{Fe}_2\text{P}/\text{Co}@\text{NPC}$  after 2000 cycles of CV test for ORR.



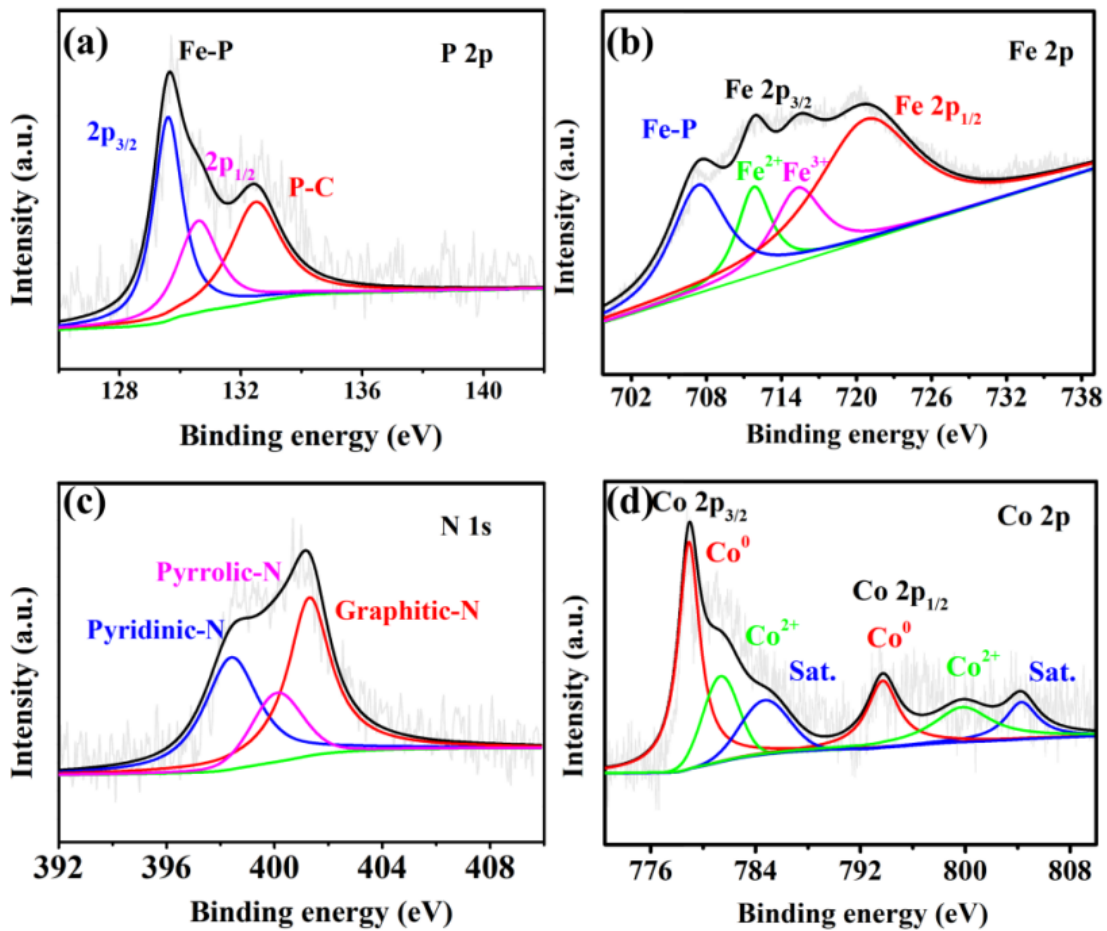

**Figure S22.** a) P 2p; b) Fe 2p; c) N 1s; d) Co 2p for Fe<sub>2</sub>P/Co@NPC after 2000 cycles of CV test for ORR.

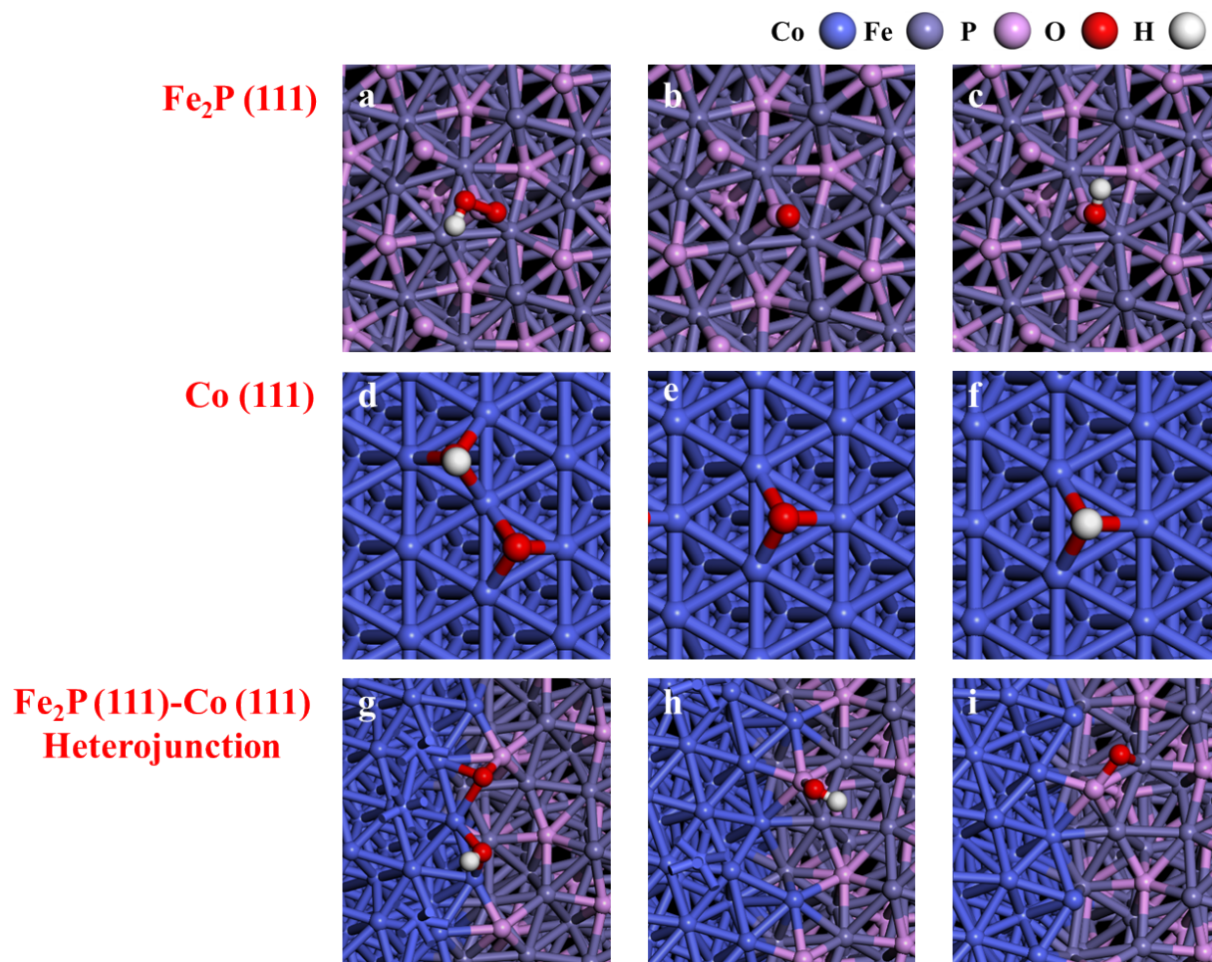

**Figure S23.** The three intermediates (OOH\*, O\*, OH\*) adsorption diagram for Fe<sub>2</sub>P(111) (a-c), Co(111) (d-f), Fe<sub>2</sub>P(111)-Co(111) (g-i).

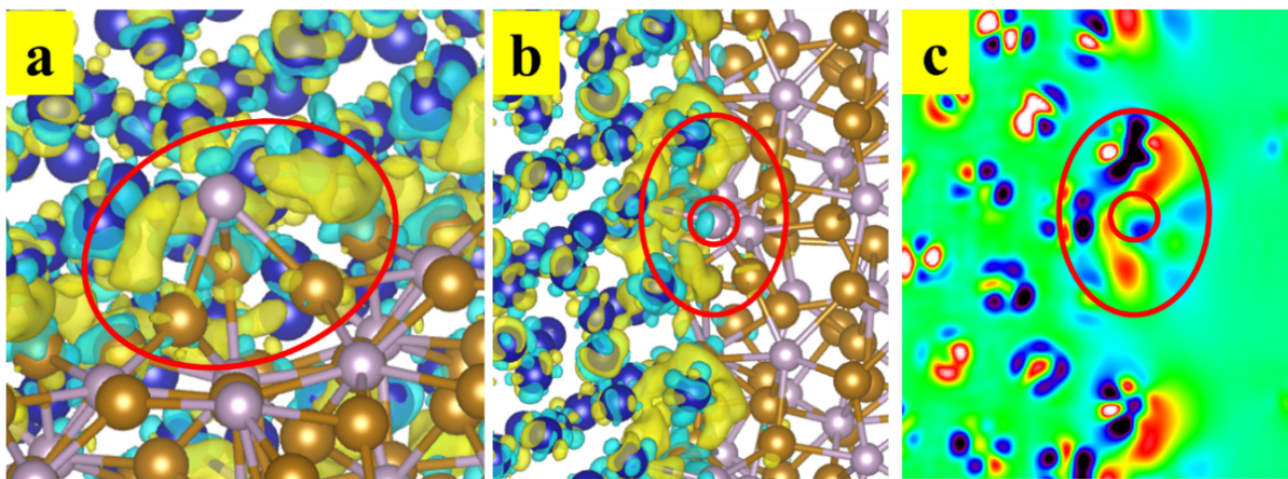

**Figure S24.** The Charge transfer diagram 3d (a-b) and 2d (c) at the Fe<sub>2</sub>P(111)-Co(111) heterojunction interface represented by charge density differential method, where yellow represents charge increase and blue represents charge decrease. It can be seen that the electrons around the P active site (at the interface) are greatly increased.

**Table S1.** Inductively coupled plasma (ICP) results of different electrocatalysts (wt %).

| Sample                        | Fe   | Co    |
|-------------------------------|------|-------|
| Co@NC                         | /    | 10.10 |
| Fe <sub>2</sub> P@NPC         | 4.95 | /     |
| Fe <sub>2</sub> P/Co@NPC-850  | 5.51 | 2.70  |
| Fe <sub>2</sub> P/Co@NPC-950  | 6.13 | 5.42  |
| Fe <sub>2</sub> P/Co@NPC-1050 | 5.58 | 2.75  |

**Table S2.** The comparison of ORR, OER and HER activity of Fe<sub>2</sub>P/Co@NPC with recently reported electrocatalysts.

| Catalysts                                      | ORR<br>E <sub>1/2</sub><br>(V) | OER<br>η <sub>10</sub><br>(mV) | HER<br>η <sub>10</sub><br>(mV) | Reference        |
|------------------------------------------------|--------------------------------|--------------------------------|--------------------------------|------------------|
| <b>Fe<sub>2</sub>P/Co@NPC</b>                  | <b>0.876</b>                   | <b>331</b>                     | <b>235</b>                     | <b>This work</b> |
| FeCo/CO <sub>2</sub> P@NPCF                    | 0.770                          | 330                            | 260                            | 9                |
| Fe-N <sub>4</sub> SAs/NPC                      | 0.885                          | 430                            | 202                            | 10               |
| PPy/ FeTCPP/Co                                 | 0.860                          | 340                            | 240                            | 11               |
| Fe <sub>3</sub> C-Co/NC                        | 0.885                          | 340                            | 238                            | 12               |
| Co-Co <sub>9</sub> S <sub>8</sub> @SN-CNTs-900 | 0.810                          | 450                            | 240                            | 13               |
| CoSA+Co <sub>9</sub> S <sub>8</sub> /HCNT      | 0.855                          | 330                            | 250                            | 14               |
| CO <sub>2</sub> P/CoNPC                        | 0.843                          | 326                            | 208                            | 15               |
| Co/CNFs (1000)                                 | 0.896                          | 320                            | 190                            | 16               |
| Co@N-CNTF                                      | 0.810                          | 350                            | 220                            | 17               |

**Table S3.** Summary the performance of H<sub>2</sub>/O<sub>2</sub> AEMFCs for non-precious metal catalysts.

| Catalysts                                  | Cathode loading<br>(mg cm <sup>-2</sup> ) | Anode loading<br>(mg cm <sup>-2</sup> ) | Pmax<br>(mW cm <sup>-2</sup> ) | Reference        |
|--------------------------------------------|-------------------------------------------|-----------------------------------------|--------------------------------|------------------|
| <b>Fe<sub>2</sub>P/Co@NPC</b>              | <b>1.0</b>                                | <b>0.4 Pt-Ru</b>                        | <b>1250</b>                    | <b>This work</b> |
| Ce/Fe-NCNW                                 | 1.0                                       | 0.75 Pt-Ru                              | 496                            | 18               |
| Fe-N-MPC                                   | 2.0                                       | 0.8 Pt-Ru                               | 473                            | 19               |
| Cu SAC                                     | 2.0                                       | 0.5 Pt                                  | 196                            | 20               |
| NFC@Fe/Fe <sub>3</sub> C-9                 | 2.0                                       | 0.4 Pt                                  | 237                            | 21               |
| FeSiNC_50a                                 | 3.0                                       | 0.4 Pt-Ru                               | 208                            | 22               |
| Fe-LC-900                                  | 2.0                                       | 0.8 Pt                                  | 50                             | 23               |
| NBSCP                                      | 3.0                                       | 0.4 Pt                                  | 172                            | 24               |
| Fe <sub>0.5</sub> -N-C                     | 1.0                                       | Pt-Ru                                   | 504                            | 25               |
| Co <sub>1.08</sub> Fe <sub>3.34</sub> @NGT | 3.0                                       | 0.4 Pt                                  | 117                            | 26               |

**Table S4.** Summary the performance of Zn-air battery with previously reported electrocatalysts.

| Catalysts                               | Open Voltage<br>(V) | Pmax<br>(mW cm <sup>-2</sup> ) | Reference        |
|-----------------------------------------|---------------------|--------------------------------|------------------|
| <b>Fe<sub>2</sub>P/Co@NPC</b>           | <b>1.35</b>         | <b>233.56</b>                  | <b>This work</b> |
| Co-NDC                                  | 1.30                | 154.00                         | 27               |
| Co-N-CNTs                               | 1.36                | 101.00                         | 1                |
| Fe-SCNS                                 | 1.47                | 163.00                         | 28               |
| PcCu-O <sub>8</sub> -Co/CNT             | 1.37                | 94.00                          | 29               |
| Fe-N/P-C-700                            | 1.42                | 133.20                         | 30               |
| FeCo@C MS.                              | 1.34                | 86.09                          | 31               |
| CO <sub>2</sub> FeO <sub>4</sub> /NCNTs | 1.43                | 90.68                          | 32               |
| CoNi-SAs/NC                             | 1.36                | 101.40                         | 33               |

**Table S5.** Free energy of each intermediate process, each value has been corrected for zero-point energy and entropy ( $G_K$ ) to get  $\Delta G$ . Unit is eV.

| Species                        | $\Delta G_{OH}$ | $\Delta G_{O^*}$ | $\Delta G_{OOH^*}$ |
|--------------------------------|-----------------|------------------|--------------------|
| Co(111)                        | 1.034           | 1.308            | 1.780              |
| Fe <sub>2</sub> P(111)         | -0.196          | -0.312           | 3.352              |
| Fe <sub>2</sub> P(111)-Co(111) | 0.768           | 2.140            | 2.922              |

## Reference

1. T. Wang, Z. Kou, S. Mu, J. Liu, D. He, I. S. Amiinu, W. Meng, K. Zhou, Z. Luo, S. Chaemchuen and F. Verpoort, *Adv. Funct. Mater.*, 2018, **28**, 1705048.
2. Y. Deng, B. Chi, J. Li, G. Wang, L. Zheng, X. Shi, Z. Cui, L. Du, S. Liao, K. Zang, J. Luo, Y. Hu and X. Sun, *Adv. Energy Mater.*, 2019, **9**, 1802856.
3. K. Mathew, R. Sundararaman, K. Letchworth-Weaver, T. A. Arias and R. G. Hennig, *J. Chem. Phys.*, 2014, **140**, 084106.
4. Z. Xiao, P. Sun, Z. Qiao, K. Qiao, H. Xu, S. Wang and D. Cao, *Chem. Eng. J.*, 2022, **446**, 137112.
5. Z. Niu, H. Liu, Z. Qiao, K. Qiao, P. Sun, H. Xu, S. Wang and D. Cao, *Mater. Today Energy*, 2022, **27**, 101043.
6. H. Xu, D. Cheng, D. Cao and X. C. Zeng, *Nat. Catal.* 2018, **1**, 339-348.
7. J. K. Norskov, J. Rossmeisl, A. Logadottir, L. Lindqvist, J. R. Kitchin, T. Bligaard and H. Jonsson, *J. Phys. Chem. B*, 2004, **108**, 17886-17892.
8. V. Wang, N. Xu, J. C. Liu, G. Tang and W. T. Geng, *Comput. Phys. Commun.* 2021, **267**, 108033.
9. Q. Shi, Q. Liu, Y. Ma, Z. Fang, Z. Liang, G. Shao, B. Tang, W. Yang, L. Qin and X. Fang, *Adv. Energy Mater.*, 2020, **10**, 1903854.
10. Y. Pan, S. Liu, K. Sun, X. Chen, B. Wang, K. Wu, X. Cao, W. C. Cheong, R. Shen, A. Han, Z. Chen, L. Zheng, J. Luo, Y. Lin, Y. Liu, D. Wang, Q. Peng, Q. Zhang, C. Chen and Y. Li, *Angew. Chem. Int. Ed.* , 2018, **57**, 8614-8618.
11. J. Yang, X. Wang, B. Li, L. Ma, L. Shi, Y. Xiong and H. Xu, *Adv. Funct. Mater.*, 2017, **27**, 1606497.
12. C. C. Yang, S. F. Zai, Y. T. Zhou, L. Du and Q. Jiang, *Adv. Funct. Mater.*, 2019, **29**, 1901949.
13. H. Han, Z. Bai, T. Zhang, X. Wang, X. Yang, X. Ma, Y. Zhang, L. Yang and J. Lu, *Nano Energy*, 2019, **56**, 724-732.
14. Y. Li, R. Cao, L. Li, X. Tang, T. Chu, B. Huang, K. Yuan and Y. Chen, *Small*, 2020, **16**, 1906735.
15. H. Liu, J. Guan, S. Yang, Y. Yu, R. Shao, Z. Zhang, M. Dou, F. Wang and Q. Xu, *Adv. Mater.*, 2020, **32**, 2003649.
16. Z. Yang, C. Zhao, Y. Qu, H. Zhou, F. Zhou, J. Wang, Y. Wu and Y. Li, *Adv. Mater.*, 2019, **31**, 1808043.
17. H. Guo, Q. Feng, J. Zhu, J. Xu, Q. Li, S. Liu, K. Xu, C. Zhang and T. Liu, *J. Mater. Chem. A*, 2019, **7**, 3664-3672.
18. J.-C. Li, S. Maurya, Y. S. Kim, T. Li, L. Wang, Q. Shi, D. Liu, S. Feng, Y. Lin and M. Shao, *ACS Catal.* , 2020, **10**, 2452-2458.
19. J. Lilloja, E. Kibena-Pöldsepp, A. Sarapuu, M. Käärrik, J. Kozlova, P. Paiste, A. Kikas, A. Treshchalov, J. Leis, A. Tamm, V. Kisand, S. Holdcroft and K. Tammeveski, *Appl. Catal. B*, 2022, **306**, 121113.
20. L. Cui, L. Cui, Z. Li, J. Zhang, H. Wang, S. Lu and Y. Xiang, *J. Mater. Chem. A*, 2019, **7**, 16690-16695.



21. M. Karuppanan, J. E. Park, H. E. Bae, Y. H. Cho and O. J. Kwon, *Nanoscale*, 2020, **12**, 2542-2554.
22. H. S. Kim, C. H. Lee, J.-H. Jang, M. S. Kang, H. Jin, K.-S. Lee, S. U. Lee, S. J. Yoo and W. C. Yoo, *J. Mater. Chem. A*, 2021, **9**, 4297-4309
23. R. Soni, S. N. Bhange and S. Kurungot, *Nanoscale*, 2019, **11**, 7893-7902.
24. D. W. Lee, J. H. Jang, I. Jang, Y. S. Kang, S. Jang, K. Y. Lee, J. H. Jang, H. J. Kim and S. J. Yoo, *Small*, 2019, **15**, 1902090.
25. S. H. Lee, J. Kim, D. Y. Chung, J. M. Yoo, H. S. Lee, M. J. Kim, B. S. Mun, S. G. Kwon, Y. E. Sung and T. Hyeon, *J. Am. Chem. Soc.*, 2019, **141**, 2035-2045.
26. S. Sultan, J. N. Tiwari, J.-H. Jang, A. M. Harzandi, F. Salehnia, S. J. Yoo and K. S. Kim, *Adv. Energy Mater.*, 2018, **8**, 1801002.
27. Z. Chen, Q. Wang, X. Zhang, Y. Lei, W. Hu, Y. Luo and Y. Wang, *Sci. Bull.*, 2018, **63**, 548-555.
28. L. Zou, C. C. Hou, Q. Wang, Y. S. Wei, Z. Liu, J. S. Qin, H. Pang and Q. Xu, *Angew. Chem. Int. Ed.*, 2020, **59**, 19627-19632.
29. H. Zhong, K. H. Ly, M. Wang, Y. Krupskaya, X. Han, J. Zhang, J. Zhang, V. Kataev, B. Buchner, I. M. Weidinger, S. Kaskel, P. Liu, M. Chen, R. Dong and X. Feng, *Angew. Chem. Int. Ed.*, 2019, **58**, 10677-10682.
30. K. Yuan, D. Lutzenkirchen-Hecht, L. Li, L. Shuai, Y. Li, R. Cao, M. Qiu, X. Zhuang, M. K. H. Leung, Y. Chen and U. Scherf, *J. Am. Chem. Soc.*, 2020, **142**, 2404-2412.
31. Y. Xu, B. Chen, J. Nie and G. Ma, *Nanoscale*, 2018, **10**, 17021-17029.
32. X. T. Wang, T. Ouyang, L. Wang, J. H. Zhong, T. Ma and Z. Q. Liu, *Angew. Chem. Int. Ed.*, 2019, **58**, 13291-13296.
33. X. Han, X. Ling, D. Yu, D. Xie, L. Li, S. Peng, C. Zhong, N. Zhao, Y. Deng and W. Hu, *Adv. Mater.*, 2019, **31**, 1905622.
